# Supplementary material for: Genome-wide screen reveals cellular functions that counteract rifampicin lethality in Escherichia coli
Source: PubMed Central journal article supplement (PMC10782999; doi:10.1128/spectrum.02895-23), 2023-12-06
Supplement: spectrum.02895-23-s0001.pdf [file spectrum.02895-23-s0001.pdf]

**Table S1. Statistics of the Tn-seq data**

| Sample        | Total reads | Mapped reads | Template reads | insertion sites |
|---------------|-------------|--------------|----------------|-----------------|
| input rep1    | 25,753,217  | 24,404,314   | 6,500,135      | 310,306         |
| input rep2    | 31,753,300  | 30,205,098   | 8,836,837      | 315,462         |
| 0.25X_1h_rep1 | 21,380,597  | 20,315,792   | 7,043,278      | 264,992         |
| 0.25X_1h_rep2 | 19,447,306  | 18,334,126   | 6,297,947      | 231,769         |
| 4X_1h_rep1    | 20,757,959  | 19,441,561   | 6,237,121      | 169,843         |
| 4X_1h_rep2    | 32,511,060  | 31,375,440   | 8,412,891      | 173,228         |
| 20X_1h_rep1   | 26,169,545  | 25,181,922   | 8,804,567      | 198,803         |
| 20X_1h_rep2   | 30,306,167  | 29,298,859   | 8,421,783      | 171,766         |
| 0.25X_3h_rep1 | 19,972,476  | 19,242,890   | 8,302,520      | 277,957         |
| 0.25X_3h_rep2 | 22,424,442  | 21,589,488   | 6,146,798      | 256,845         |
| 4X_3h_rep1    | 26,113,643  | 24,981,615   | 8,229,931      | 233,279         |
| 4X_3h_rep2    | 25,581,091  | 24,660,957   | 7,248,518      | 199,745         |
| 20X_3h_rep1   | 28,846,007  | 27,221,795   | 9,050,211      | 213,391         |
| 20X_3h_rep2   | 29,543,869  | 28,362,082   | 5,477,620      | 177,598         |

**Table S5. Primers used in this study**

| <b>Primer</b> | <b>Sequence (5'-&gt;3')</b>                                                                  | <b>Description</b>                         |
|---------------|----------------------------------------------------------------------------------------------|--------------------------------------------|
| Tn-adaptor-F  | ATGATGGCCGGTGGATTTGTGNNANNANNNTGGTCGTGGTAT                                                   | ligate with genome                         |
| Tn-adaptor-R  | TACCACGACCA-NH2                                                                              | DNA fragments;                             |
| Tn-PCR1-F     | ATGATGGCCGGTGGATTTGTG                                                                        | enrich DNA fragments                       |
| Tn-PCR1-R     | AAAGCTCTCATCAACCGTGG                                                                         | containing transposon;                     |
| Tn-PCR2-F     | AATGATACGGCGACCACCGAGATCTACACTCTTCCCTACACGACGCTCTCCGATCTCG<br>GGGATCCTCTAGAGTCGACCTGC        | bridge amplification<br>before sequencing; |
| Tn-PCR2-R     | CAAGCAGAAGACGGCATAACGAGATTGTTTCGAGTGACTGGAGTTCAGACGTGTGCTCTTC<br>CGATCTATGATGGCCGGTGGATTTGTG |                                            |
| nuo-KO-F      | GAGCAGTGAATCTGGCGCTACTTTTGTAGAGTAAGCAATGATTCCGGGGATCCGTCGA                                   | knock out <i>nuoA-N</i>                    |
| nuo-KO-R      | TGACTTACAAAGTAACAGATTACATCAGCGGCATTGCCAATGTAGGCTGGAGCTGCTT                                   |                                            |
| nuo-test-F    | GTCGTC AAGGATCTGGGGTG                                                                        | verify $\Delta nuoA-N$                     |
| nuo-test-R    | AGAGAAAACCGCTTCAGGCA                                                                         |                                            |
| bamB-KO-F     | GAAAATTAATAATTTGTCCATCTGAGAGGGACCCGATGATTCCGGGGATCCGTCGA                                     | knock out <i>bamB</i>                      |
| bamB-KO-R     | CCAGGAGCCGTTTTCAAAGTGAACGACAGACGATTATGTAGGCTGGAGCTGCTT                                       |                                            |
| bamB-test-F   | CCTGCGTGGTGAAGCATTGC                                                                         | verify $\Delta bamB$                       |
| bamB-test-R   | TAGCAGCCAGTCCCTTCCCG                                                                         |                                            |
| skp-test-F    | CTCCTACGCCAGCCGTTCC                                                                          | verify $\Delta skp$                        |
| skp-test-R    | GGGTCATGACAACCGCGGAC                                                                         |                                            |
| recG-test-F   | GCCGGAAGCAGAGCAACAAC                                                                         | verify $\Delta recG$                       |
| recG-test-R   | CTTTGGCCCGTCGCACATG                                                                          |                                            |
| recA-test-F   | GGGAATGCTTCAGCGGCGAC                                                                         | verify $\Delta recA$                       |
| recA-test-R   | CCATAATCGGTGCCGCGAG                                                                          |                                            |
| fecA-test-F   | CGGGACGTTCCCGCTGAAA                                                                          | verify $\Delta fecA$                       |
| fecA-test-R   | CACCACAATCCGTTGTGGCG                                                                         |                                            |
| fepD-test-F   | TCATCTGGATCTGCACCGGC                                                                         | verify $\Delta fepD$                       |
| fepD-test-R   | GCGGGTTACGCATCAGCGAC                                                                         |                                            |
| fetA-test-F   | CCGACAATGACCAGCGCGAC                                                                         | verify $\Delta fetA$                       |
| fetA-test-R   | GGCTGGCATCATCCACGCTG                                                                         |                                            |
| katG-test-F   | CTGCCTCGAAATGAGGGCGG                                                                         | verify $\Delta katG$                       |
| katG-test-R   | AGTGTGAGCACAACCAGGCC                                                                         |                                            |
| exbB-test-F   | GCAAATGGCGTGCTGGTGAC                                                                         | verify $\Delta exbB$                       |
| exbB-test-R   | CGGCGTGCTGGTAGAAGCAG                                                                         |                                            |
| greA-test-F   | CGCTGCCACGCTAAGATTATCC                                                                       | verify $\Delta greA$                       |
| greA-test-R   | CTGACCTGGGACTTGTACCCGG                                                                       |                                            |
| uvrA-test-F   | GCACCGTGTATCTCGACGGTTC                                                                       | verify $\Delta uvrA$                       |
| uvrA-test-R   | CGGGAAACAAACCTGGCCAGAC                                                                       |                                            |
| gltA-test-F   | GATACGGCCAGTGC GGCCAATG                                                                      | verify $\Delta gltA$                       |
| gltA-test-R   | CTGGGTGGCTCGGGATTGCAGGG                                                                      |                                            |

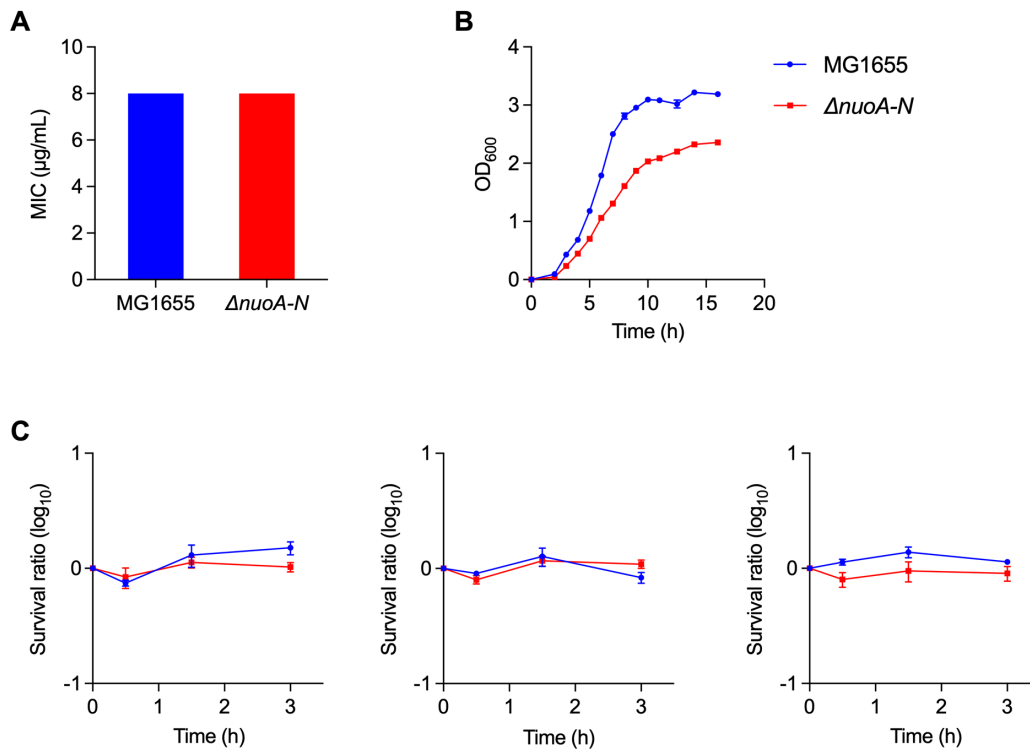

**Figures S1.** (A) Rifampicin susceptibility (MIC<sub>90</sub>) of *E. coli* MG1655 and the  $\Delta nuoA-N$  mutant. (B) Grow curves of *E. coli* MG1655 and the  $\Delta nuoA-N$  mutant. (C) Survival of *E. coli* MG1655 and the  $\Delta nuoA-N$  mutant treated with spectinomycin (64 μg/ml, left), chloramphenicol (50 μg/ml, middle), tetracycline (10 μg/ml, right). Data shown are mean  $\pm$  SE in triplicate.
